# Supplementary figures and images for: Performance of conventional pigs and Göttingen miniature pigs in a spatial holeboard task: effects of the putative muscarinic cognition impairer Biperiden
Source: Springer Nature journal article supplement (doi:10.1186/1744-9081-9-4), 2013-01-01

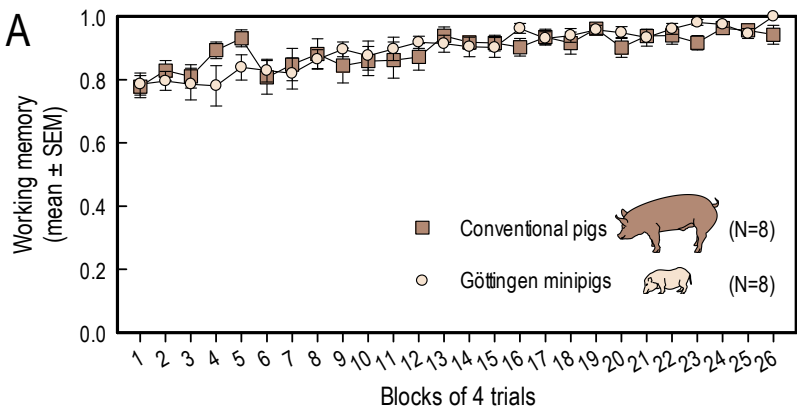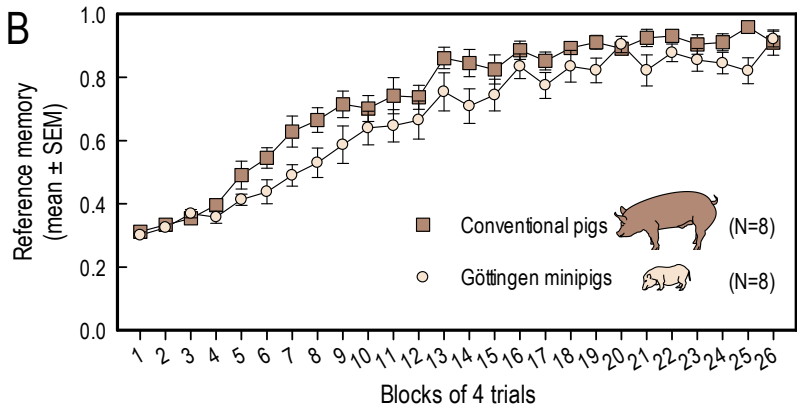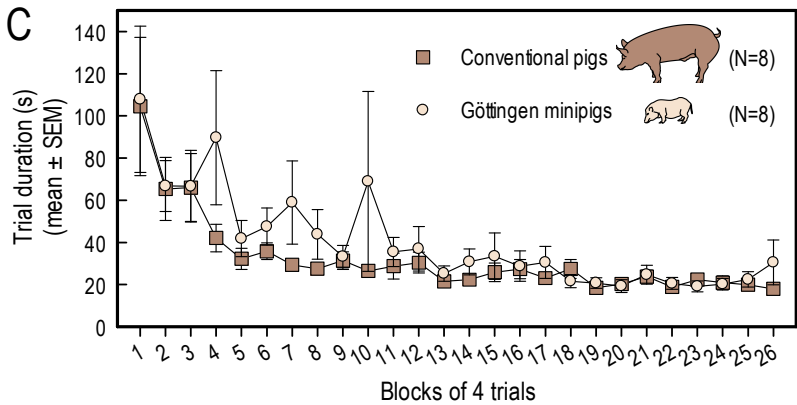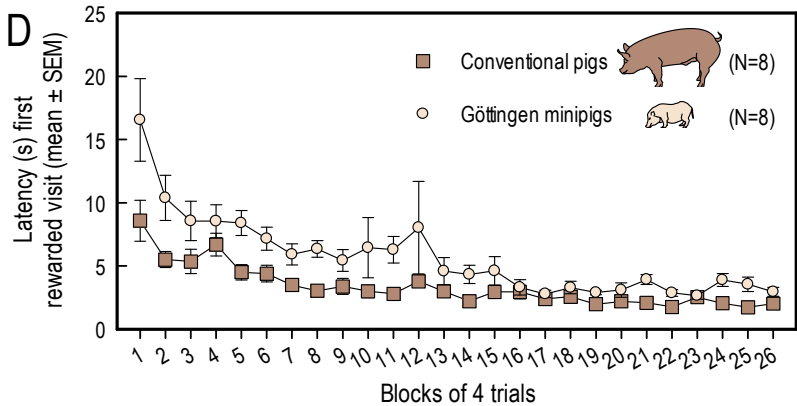

Supplement: 12993_2012_431_MOESM1_ESM.pdf [file 12993_2012_431_MOESM1_ESM.pdf]

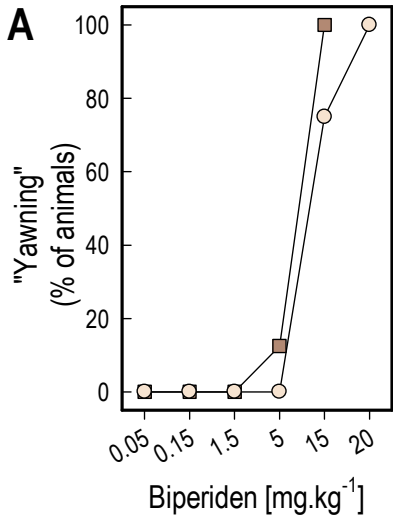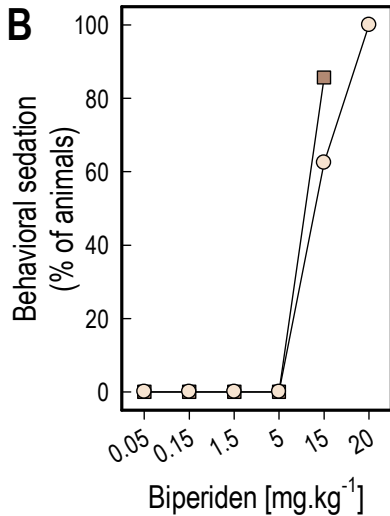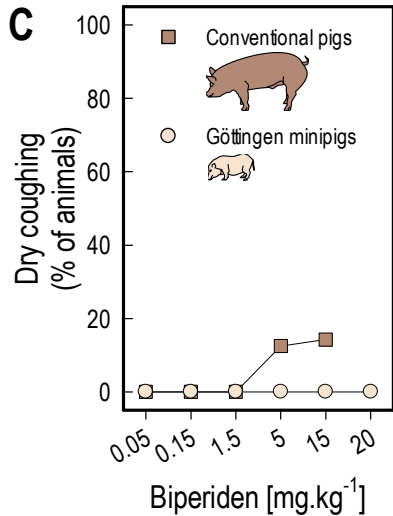

Supplement: 12993_2012_431_MOESM2_ESM.pdf [file 12993_2012_431_MOESM2_ESM.pdf]

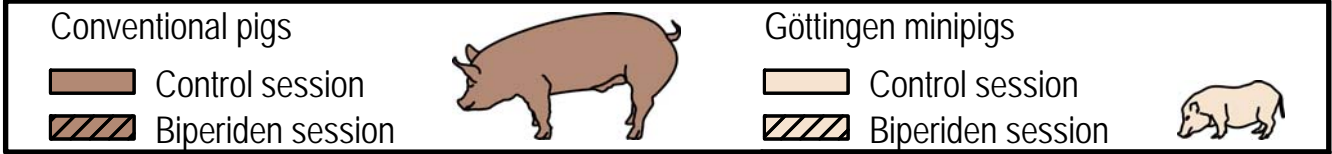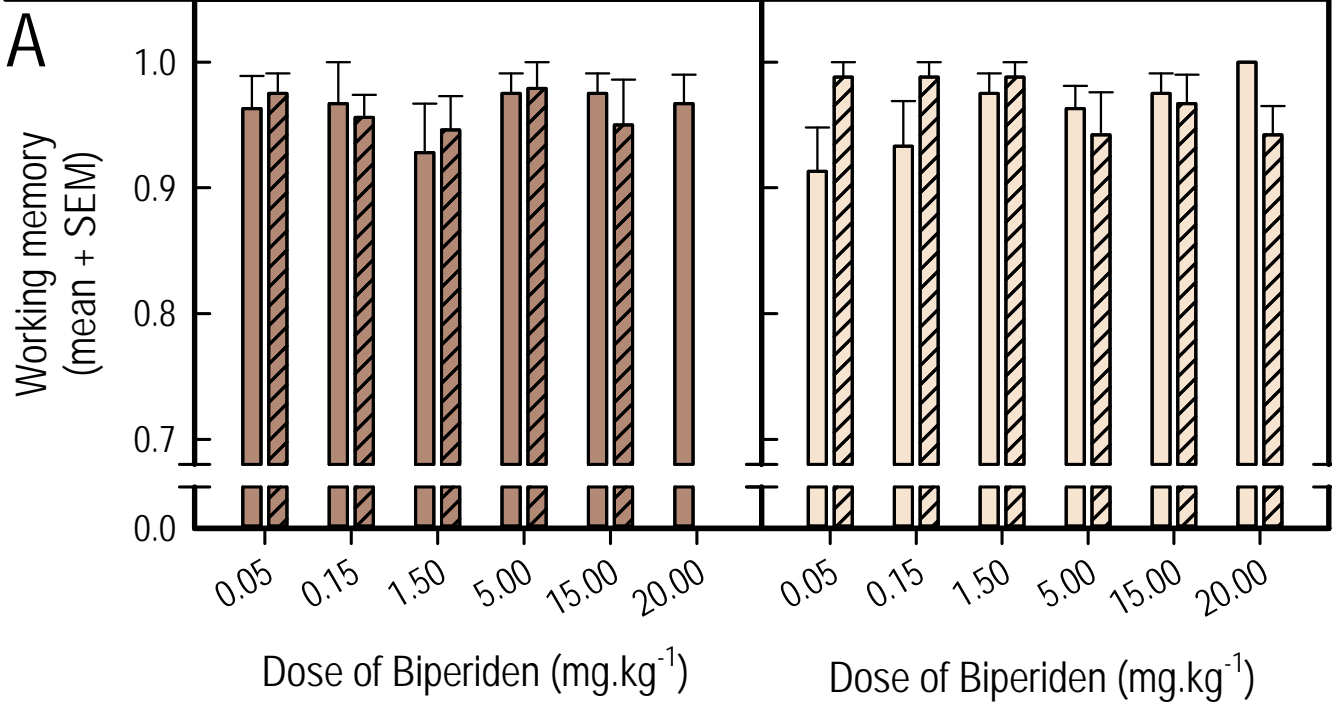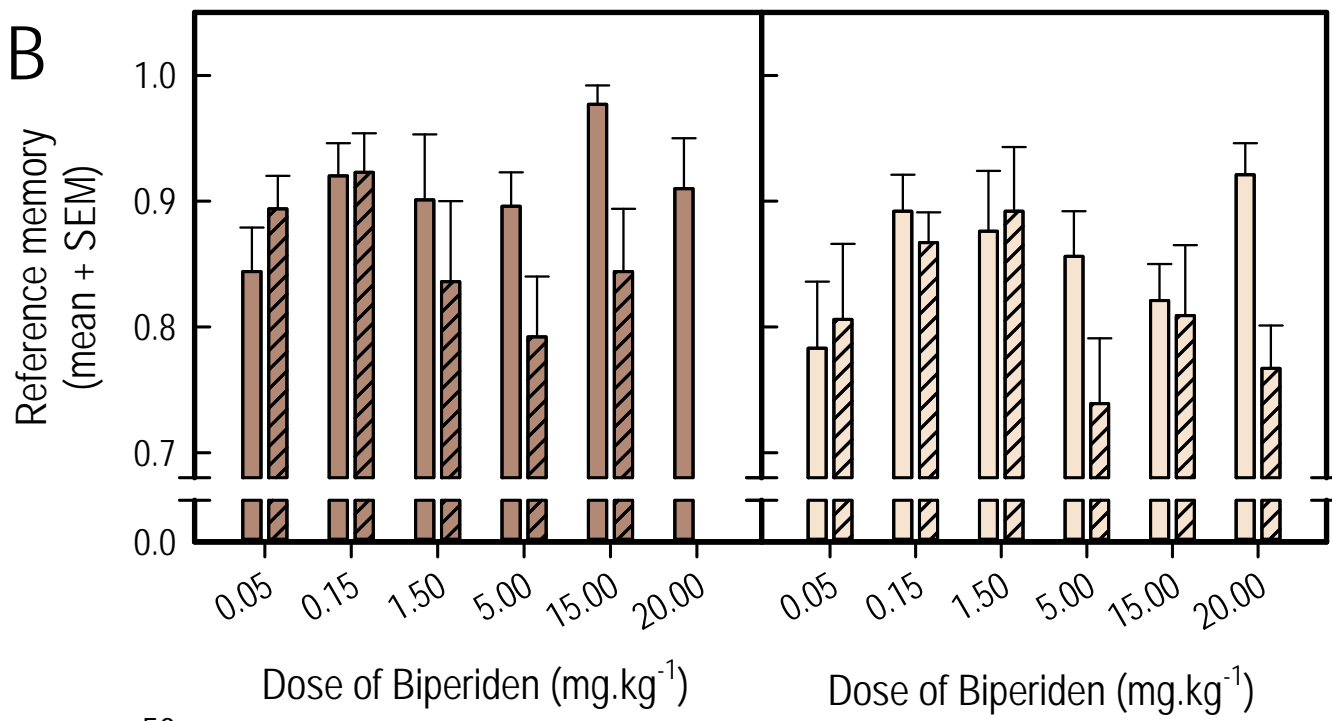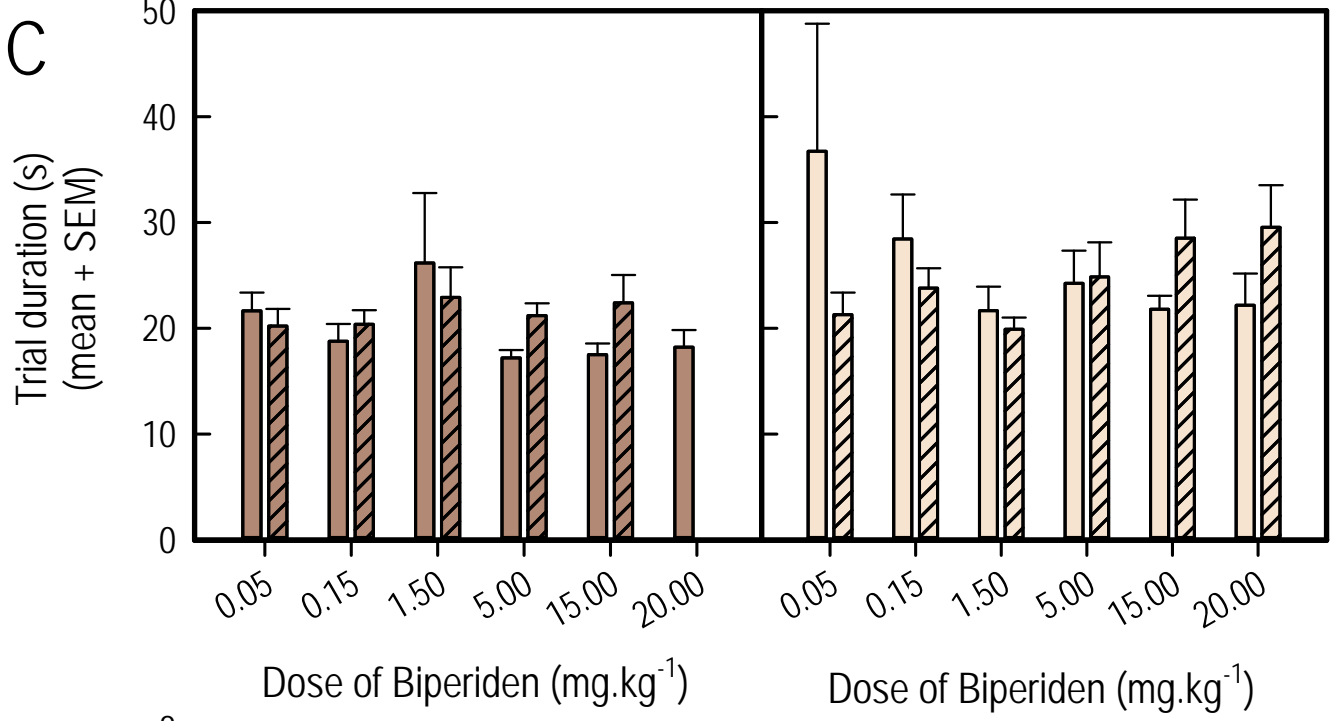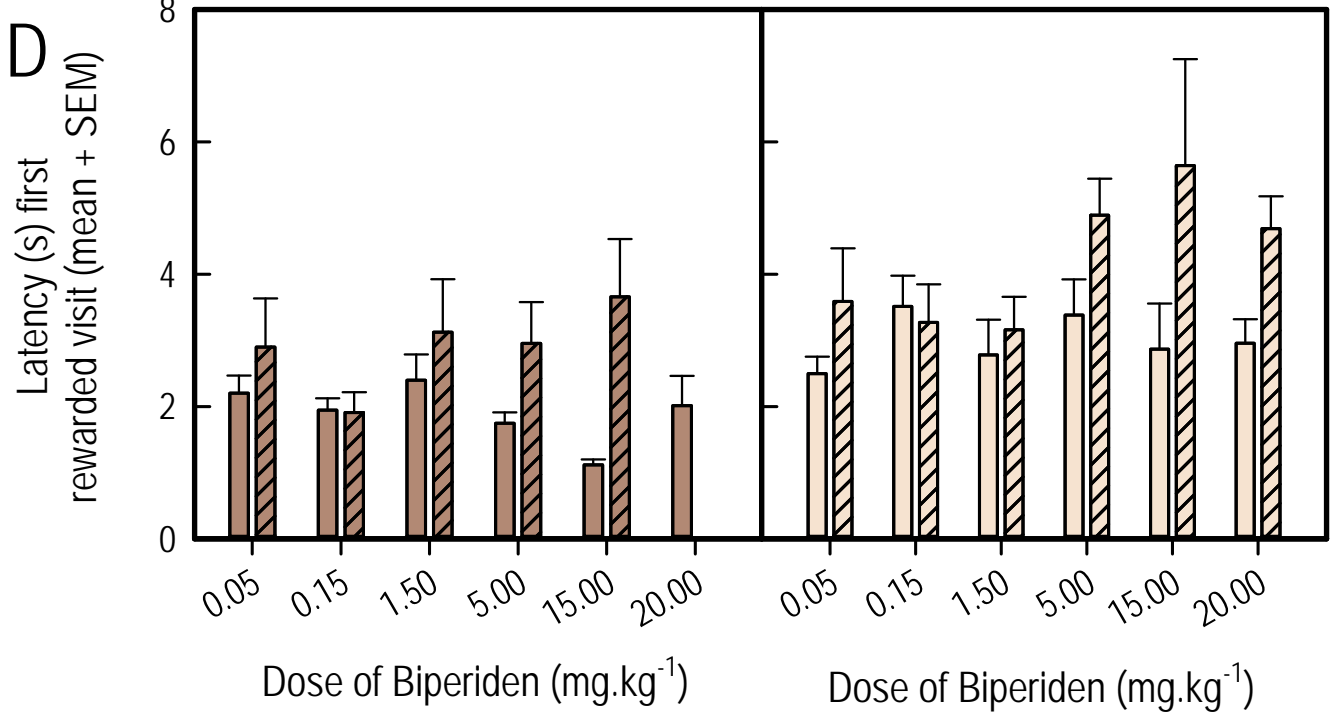

Supplement: 12993_2012_431_MOESM3_ESM.pdf [file 12993_2012_431_MOESM3_ESM.pdf]
